# Supplementary material
Source: PubMed Central journal article supplement (PMC8314666)

**Figure S1 Risk of bias**

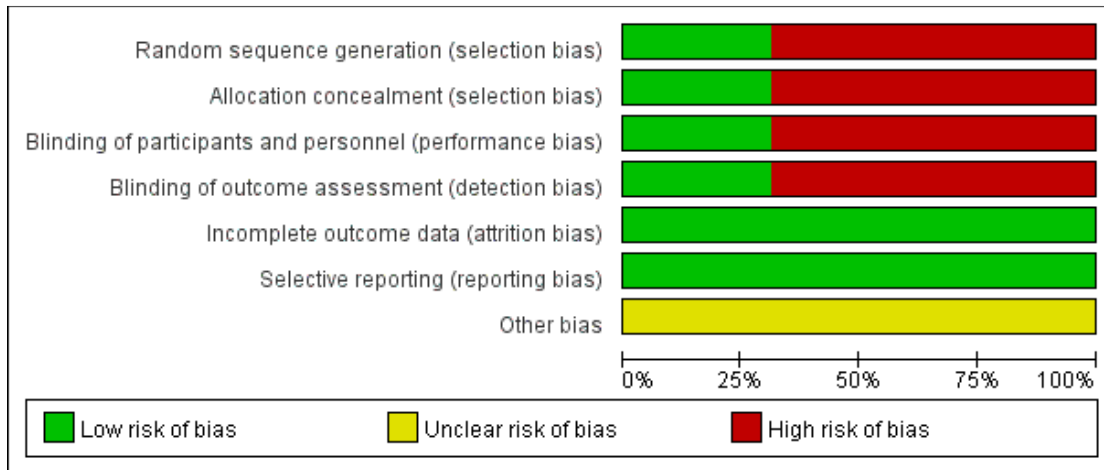

**Figure S2** Risk of bias summary

|                  | Random sequence generation (selection bias) | Allocation concealment (selection bias) | Blinding of participants and personnel (performance bias) | Blinding of outcome assessment (detection bias) | Incomplete outcome data (attrition bias) | Selective reporting (reporting bias) | Other bias |
|------------------|---------------------------------------------|-----------------------------------------|-----------------------------------------------------------|-------------------------------------------------|------------------------------------------|--------------------------------------|------------|
| Apostolo 2014    | -                                           | -                                       | -                                                         | -                                               | +                                        | +                                    | ?          |
| DeBacker 1995    | -                                           | -                                       | -                                                         | -                                               | +                                        | +                                    | ?          |
| Eskandari 2018   | +                                           | +                                       | +                                                         | +                                               | +                                        | +                                    | ?          |
| Fontana 2011     | -                                           | -                                       | -                                                         | -                                               | +                                        | +                                    | ?          |
| Ginter 2020      | +                                           | +                                       | +                                                         | +                                               | +                                        | +                                    | ?          |
| Inoue 1999       | -                                           | -                                       | -                                                         | -                                               | +                                        | +                                    | ?          |
| Javaheri 2006    | +                                           | +                                       | +                                                         | +                                               | +                                        | +                                    | ?          |
| Naghan 2019      | +                                           | +                                       | +                                                         | +                                               | +                                        | +                                    | ?          |
| Sakamoto 1995    | -                                           | -                                       | -                                                         | -                                               | +                                        | +                                    | ?          |
| Sharp 1985       | -                                           | -                                       | -                                                         | -                                               | +                                        | +                                    | ?          |
| Tojima 1988      | -                                           | -                                       | -                                                         | -                                               | +                                        | +                                    | ?          |
| Ulrich 2015      | +                                           | +                                       | +                                                         | +                                               | +                                        | +                                    | ?          |
| Verbraecken 1998 | -                                           | -                                       | -                                                         | -                                               | +                                        | +                                    | ?          |
| White 1982       | -                                           | -                                       | -                                                         | -                                               | +                                        | +                                    | ?          |
| Whyte 1988       | +                                           | +                                       | +                                                         | +                                               | +                                        | +                                    | ?          |

**Figure S3** Publication bias

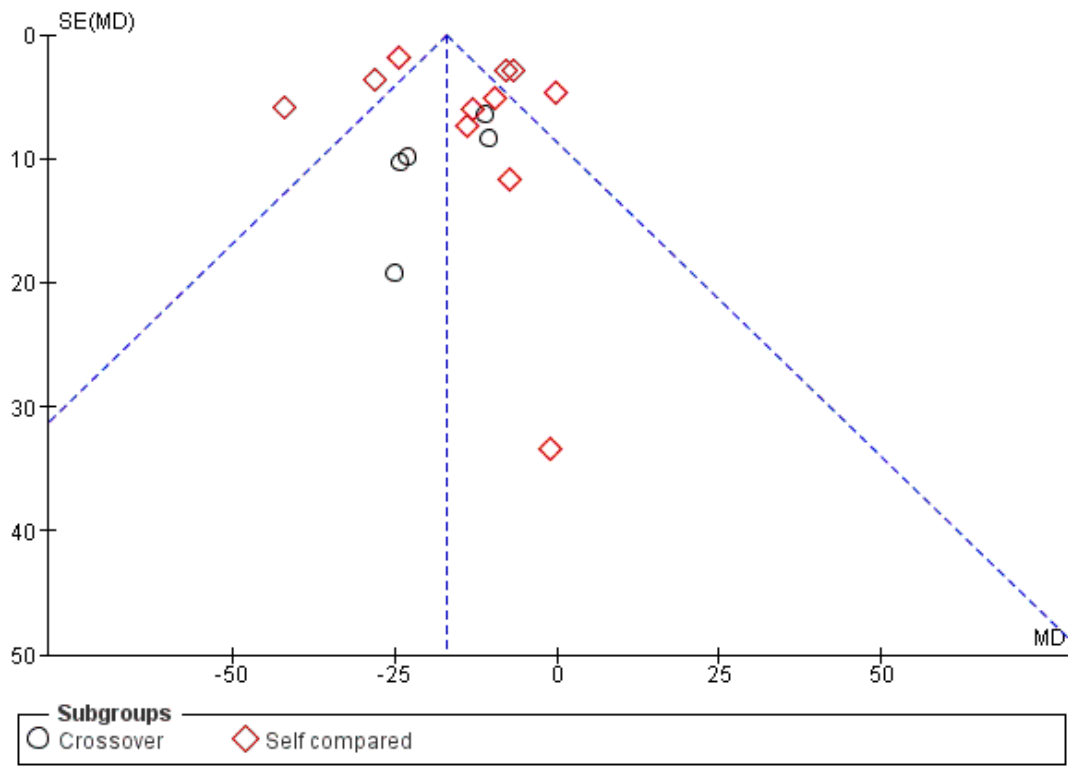

**Figure S4** Subgroup analysis of AHI according to the design of study

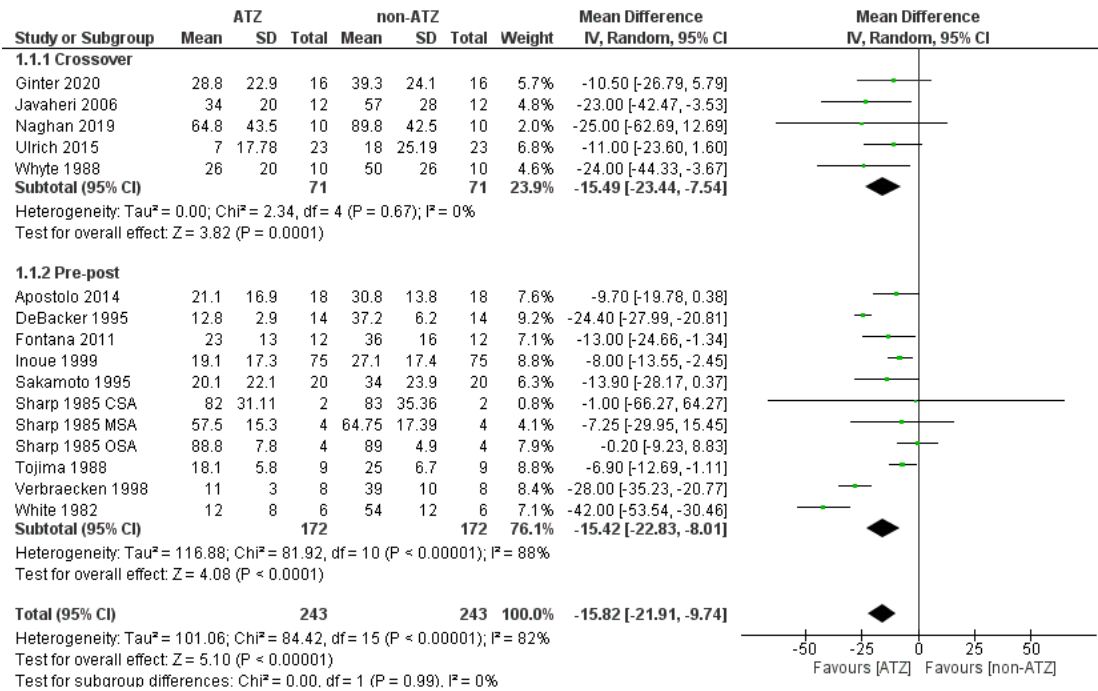

**Figure S5** Subgroup analysis of AHI according to the dominant sleep apnea type

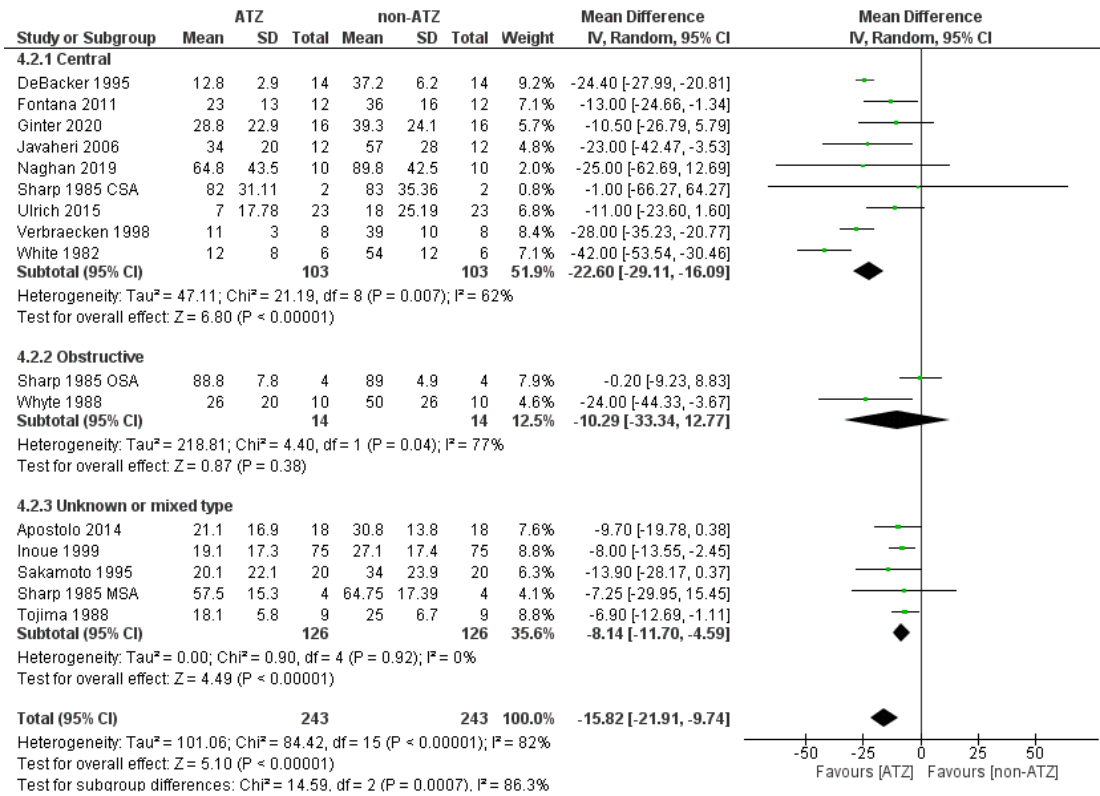

**Figure S6** AHI divided by heart failure

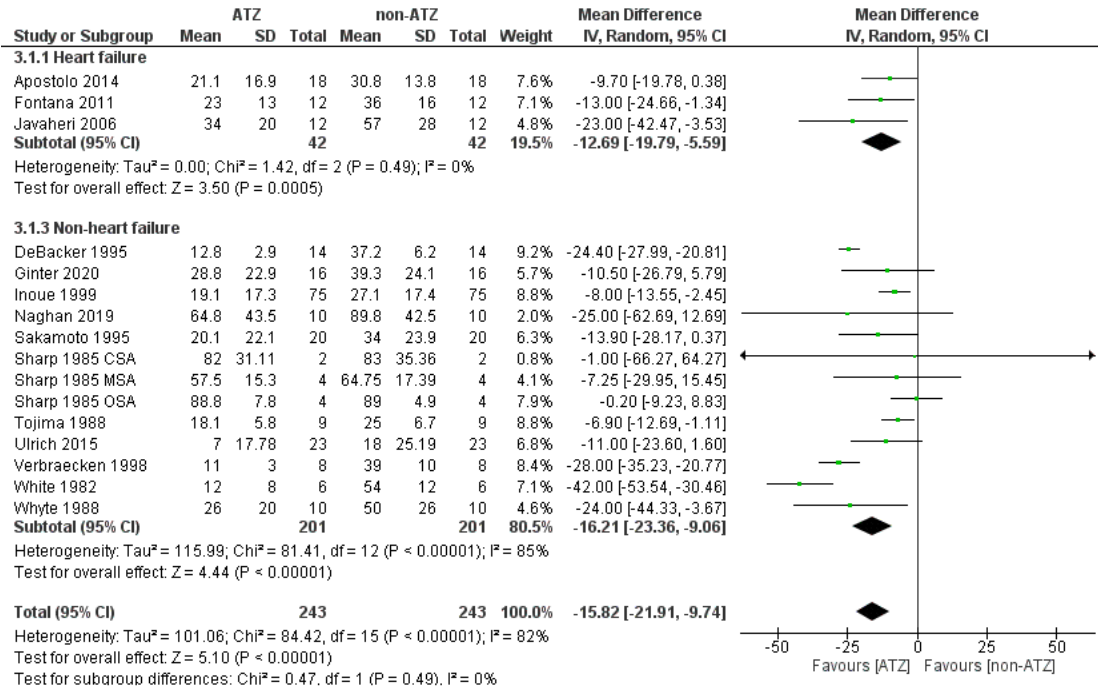

**CAI divided by heart failure**

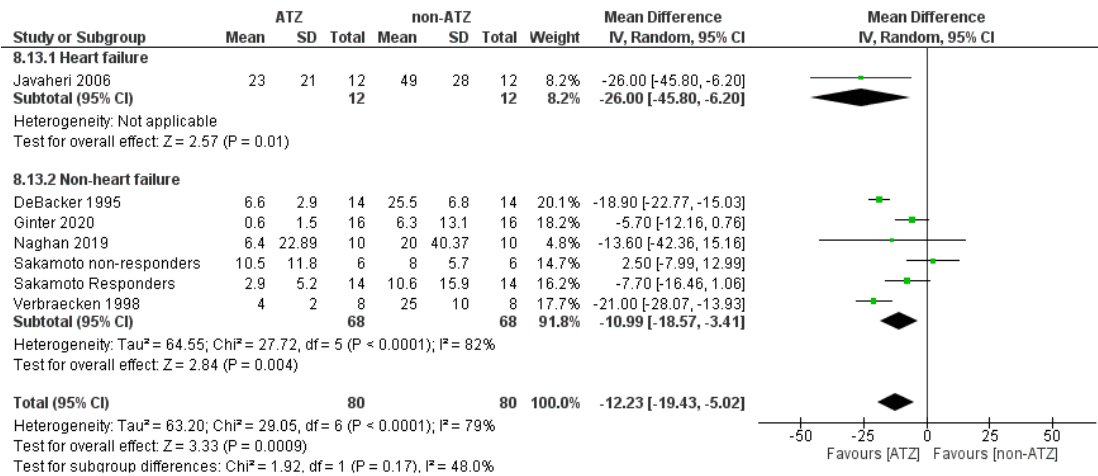

**Figure S8** OAI divided by heart failure

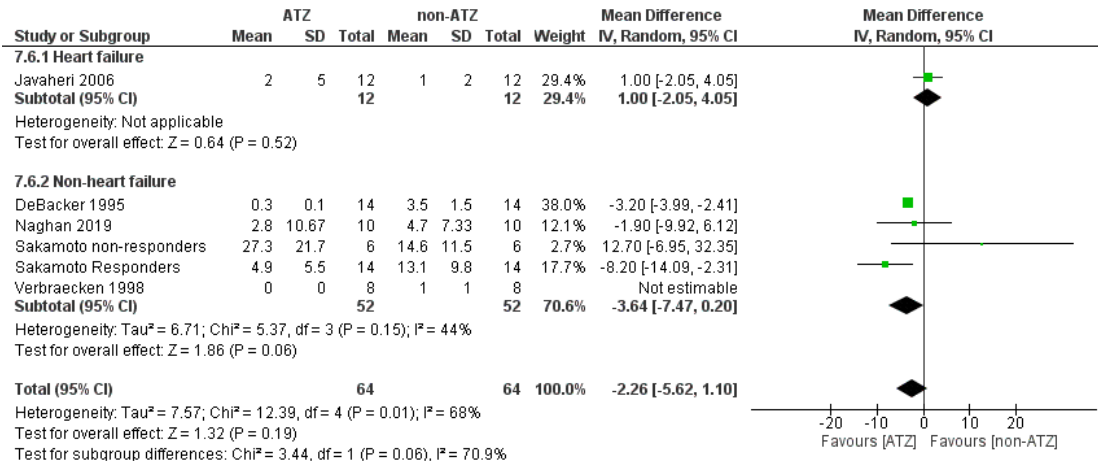



**Figure S9** Respiratory events duration

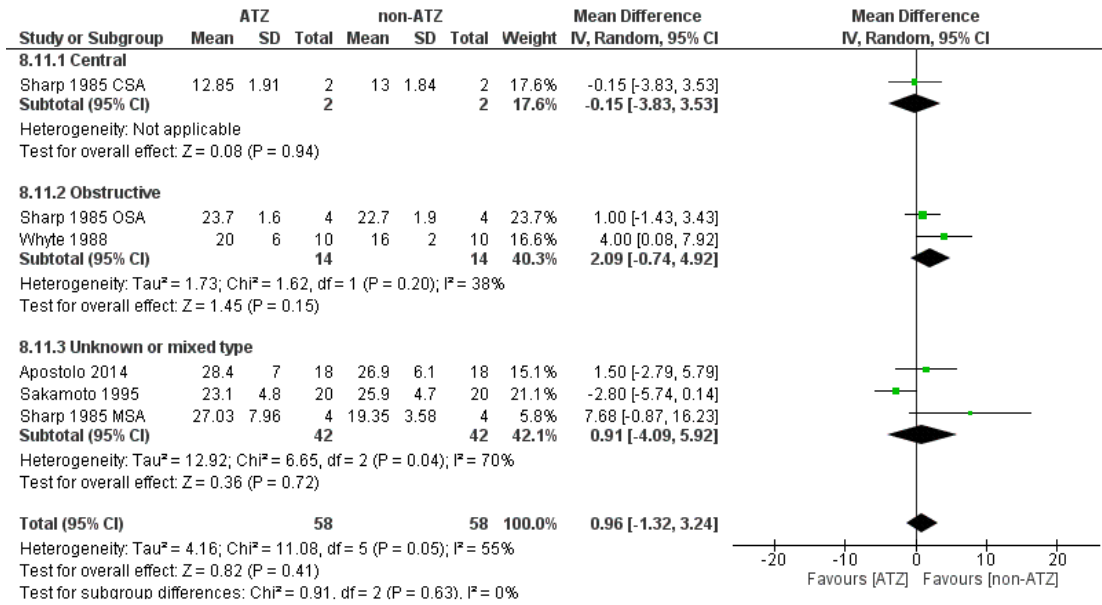

**Figure S10** Respiratory related arousal index

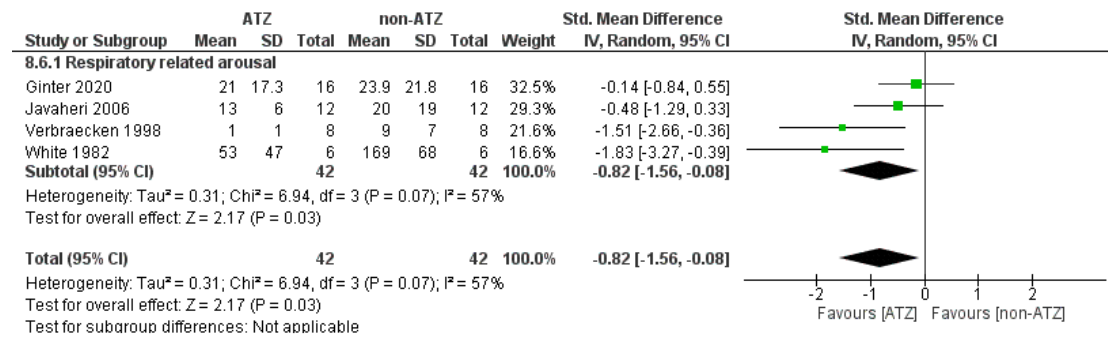

All the included studies enrolled patients with central sleep apnea

**Figure S11** Lowest SaO<sub>2</sub>

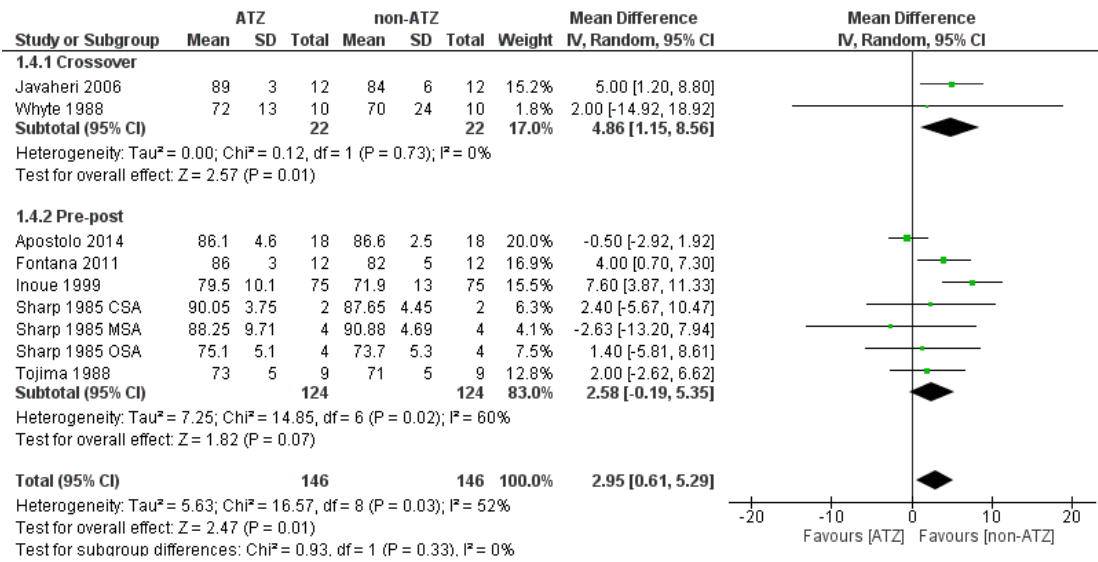

**Figure S12** Lowest SaO<sub>2</sub> divided by the type of sleep apnea

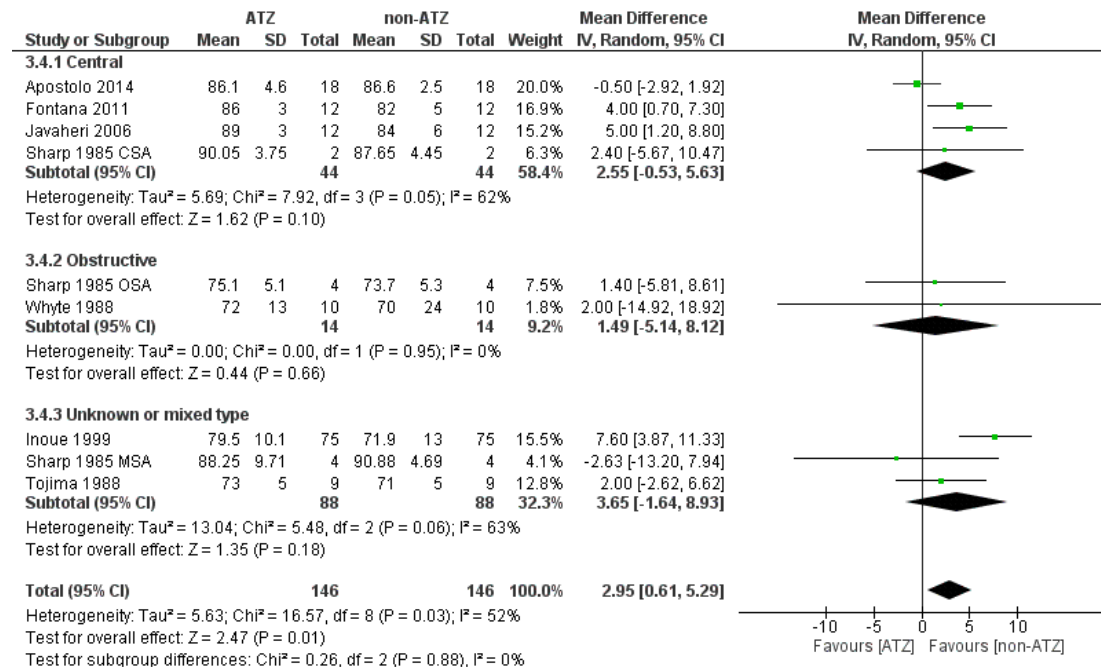

**Figure S13 Mean SaO<sub>2</sub>**

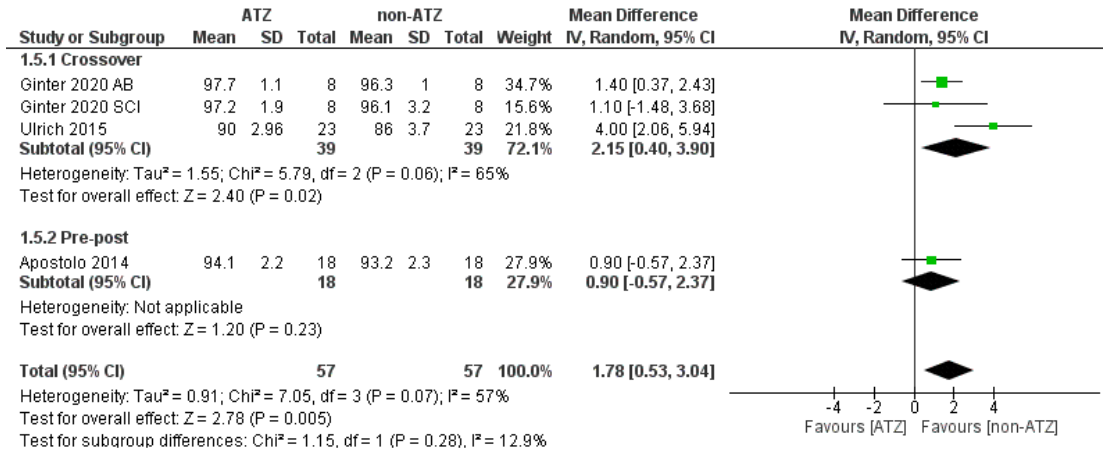

**Figure S14** Mean SaO<sub>2</sub> divided by type of sleep apnea

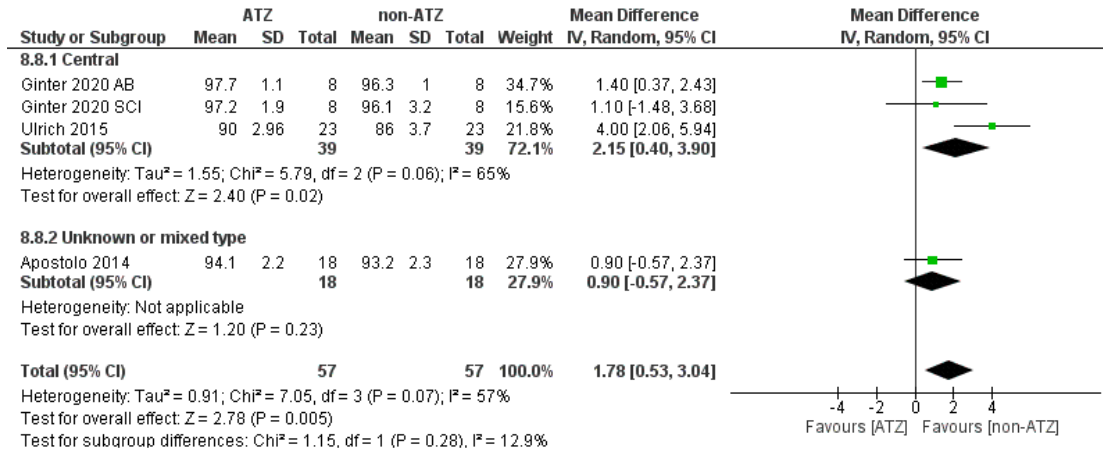

**Figure S15 TST**

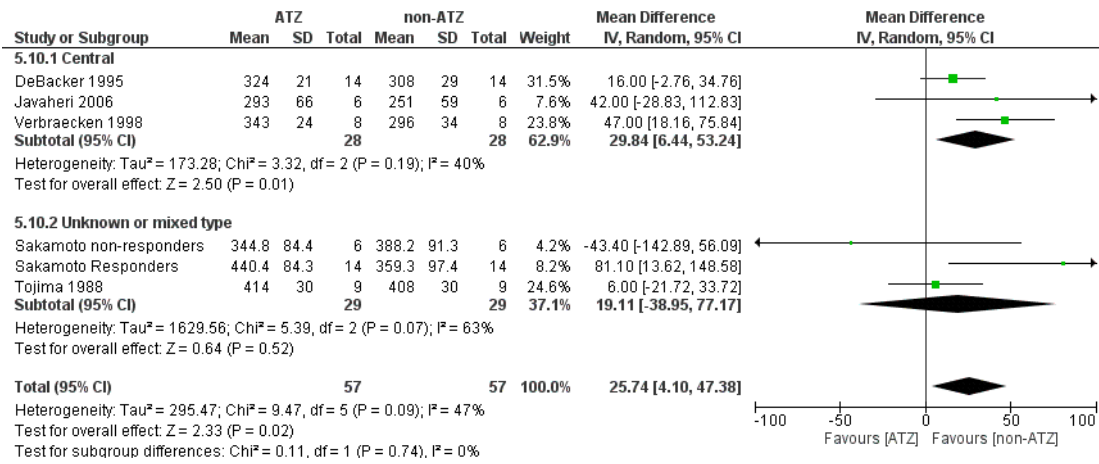

**Figure S16** Sleep efficiency

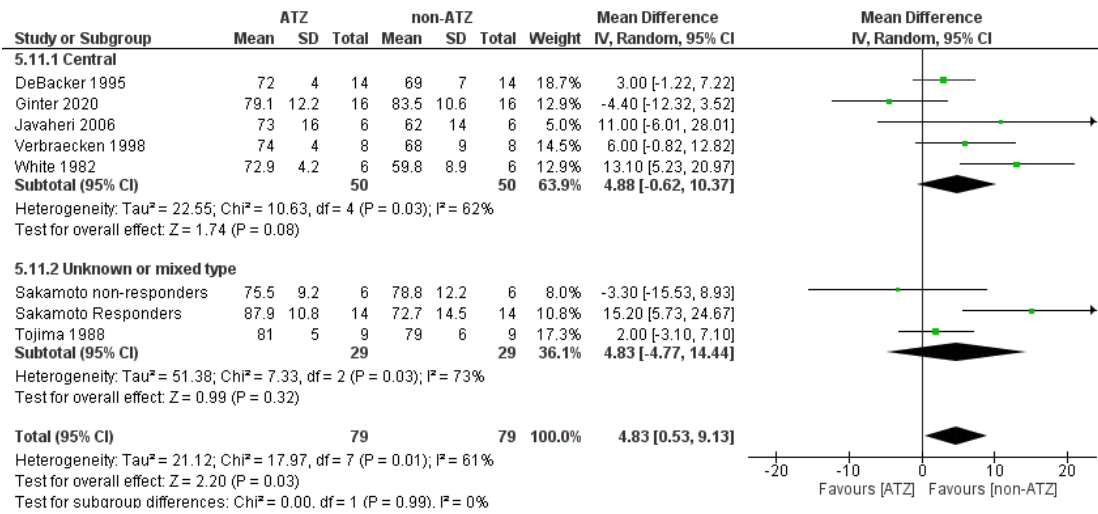



**Figure S17** N1 stage of sleep

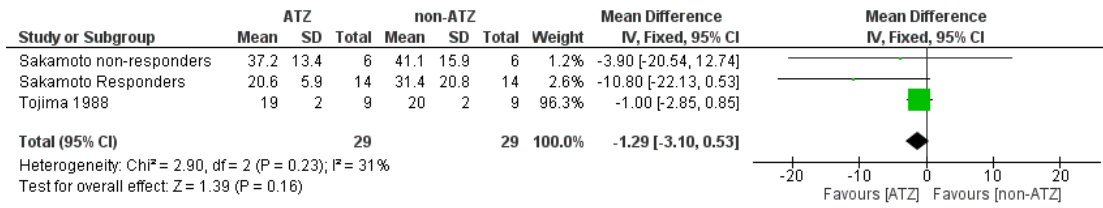

**Figure S18** Slow wave sleep

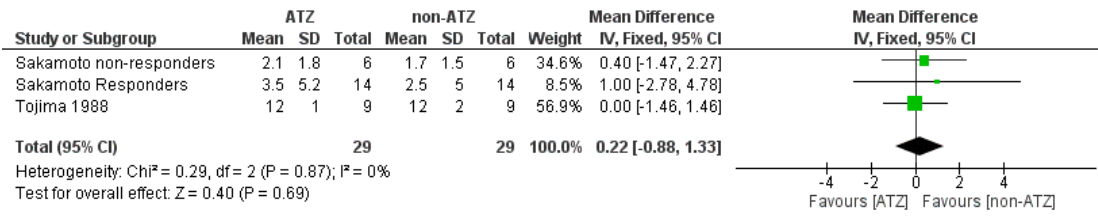

**Figure S19** Rapid eye movement sleep

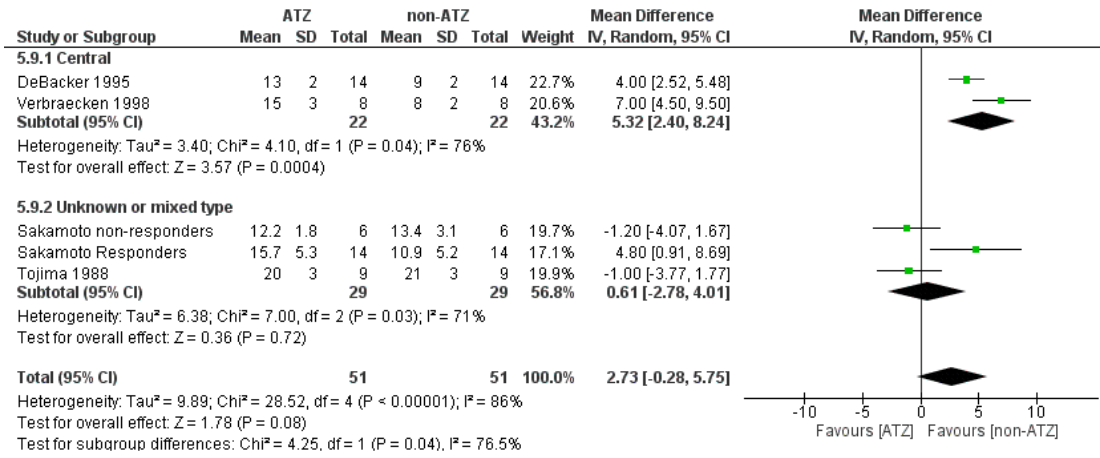

**Figure S20** N2 stage of sleep

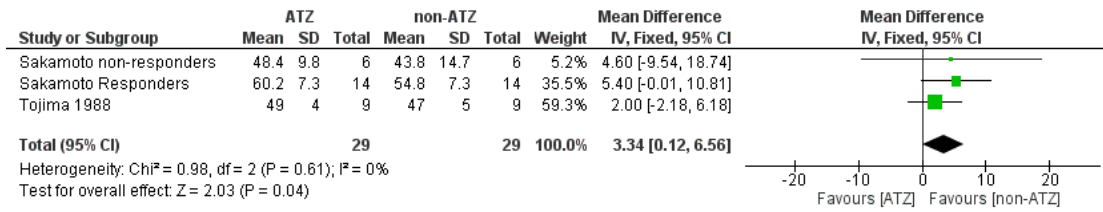

**Figure S21** Slope of hypercapnia ventilator response

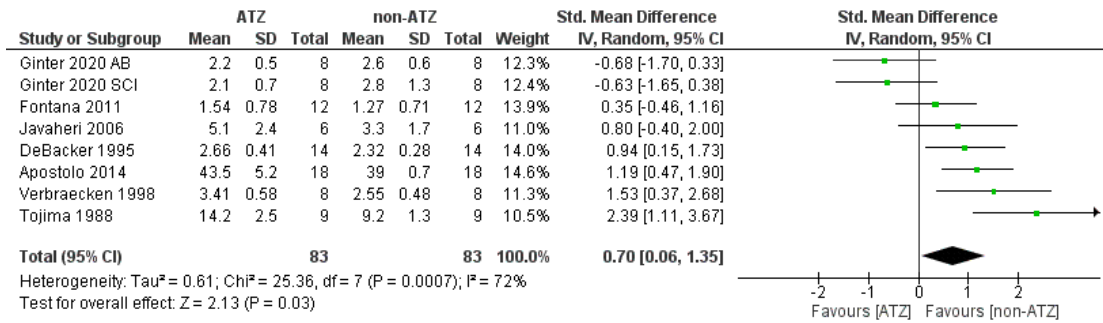

Figure S22 pH

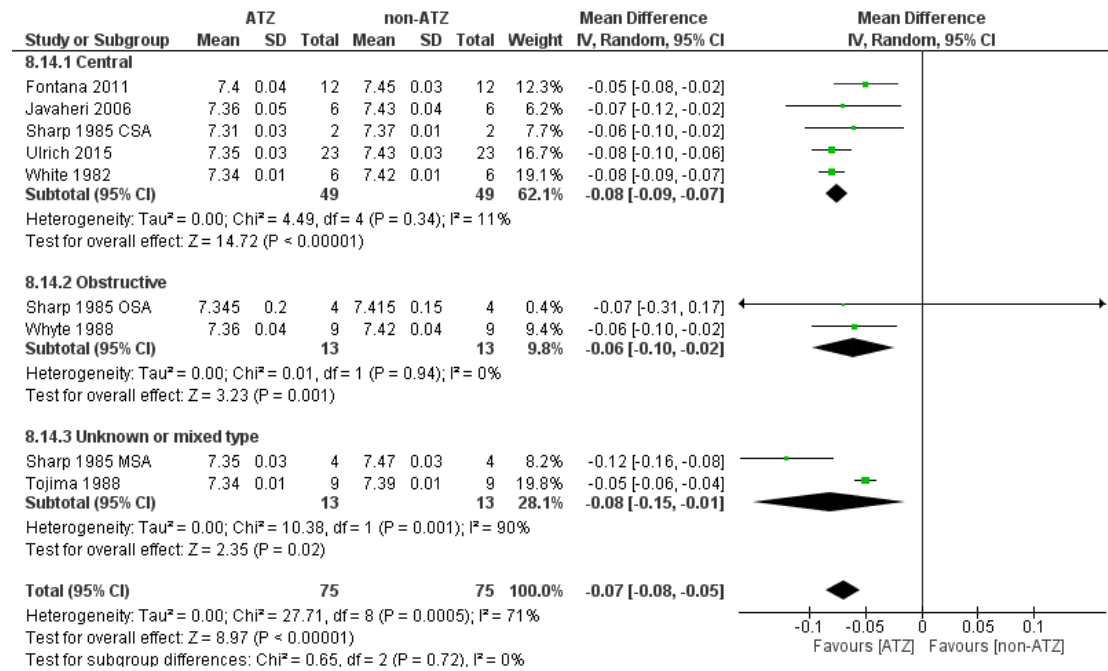

**Figure S23 PaCO<sub>2</sub>**

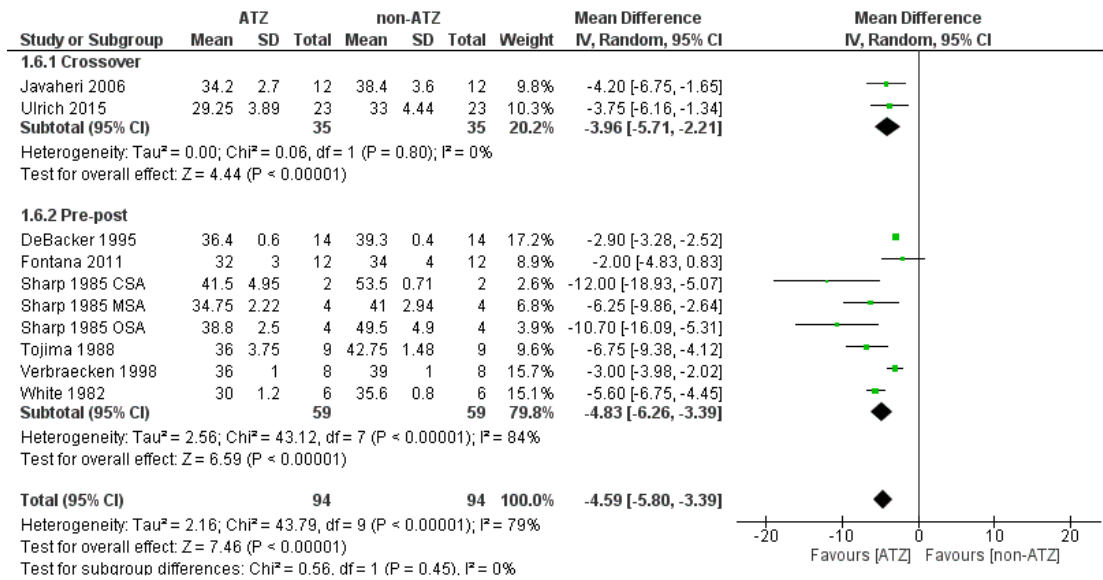

**Figure S24 HCO<sup>-</sup>**

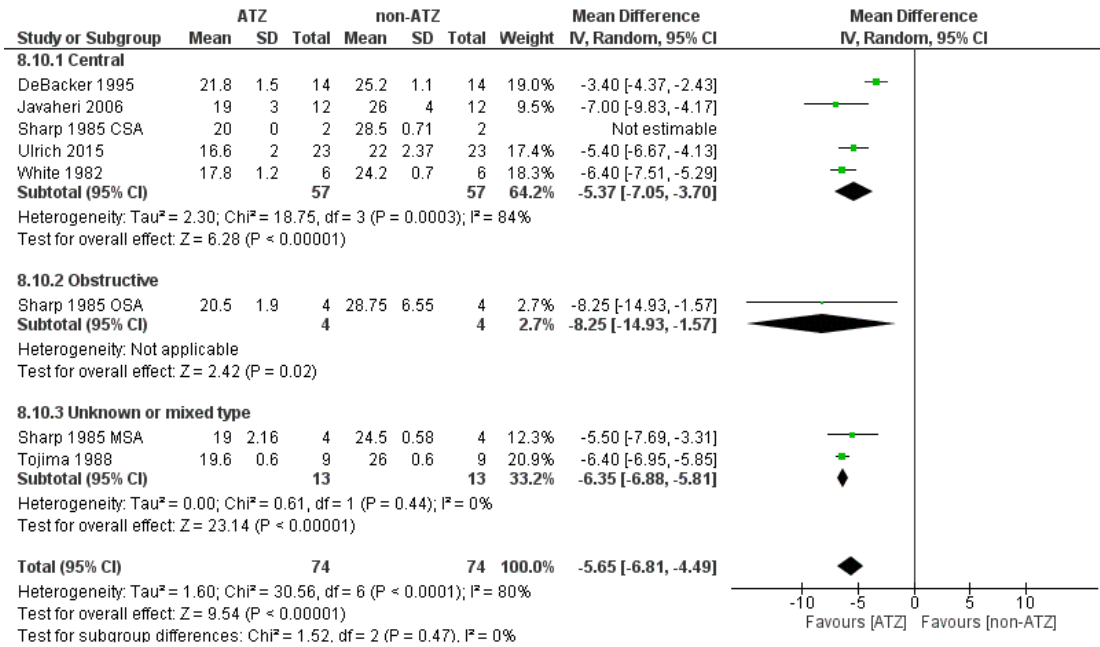



**Figure S25 PaCO<sub>2</sub> divided by type of sleep apnea**

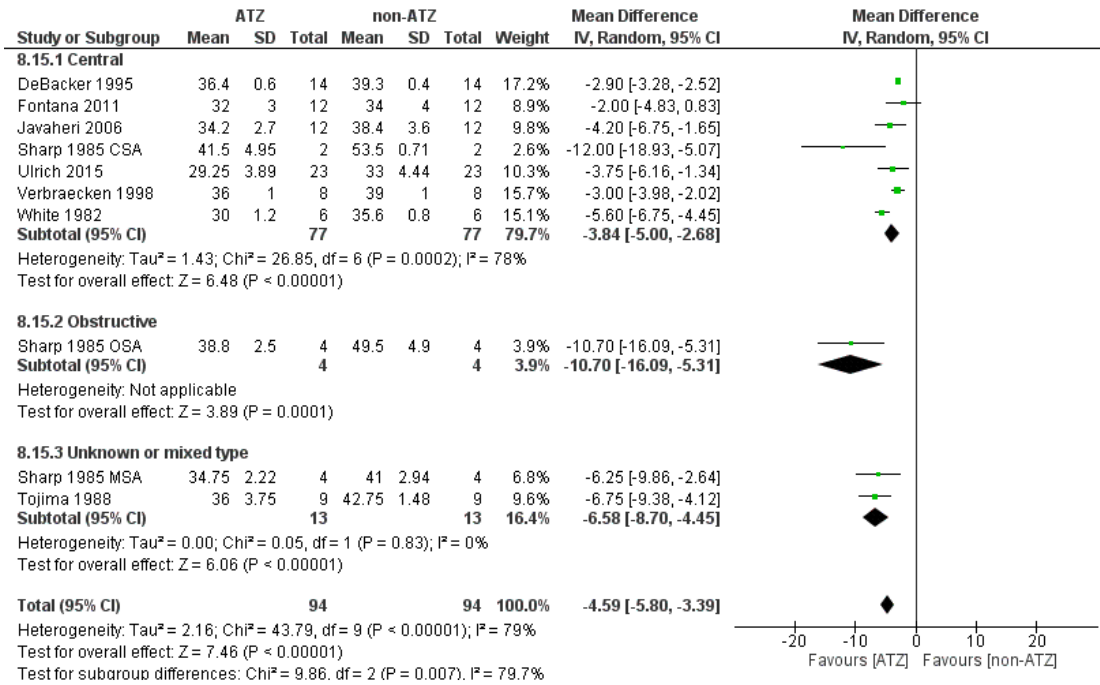

Supplement: jcsm.9116.ds001.pdf [file jcsm.9116.ds001.pdf]
